# Supplementary material
Source: PubMed Central journal article supplement (PMC3806268)
Supplement: ismej201396x1.pdf [file ismej201396x1.pdf]

**Table S1.** Station coordinates and date of sampling.

| <b>Sta.</b> | <b>Latitude</b> | <b>Longitude</b> | <b>Sampling date</b>          |
|-------------|-----------------|------------------|-------------------------------|
| 1           | 26.5            | 110.5            | July 12 <sup>th</sup> , 2008  |
| 2           | 24.5            | 109              | July 13 <sup>th</sup> 2008    |
| 3           | 20.5            | 106.5            | July 19 <sup>th</sup> , 2008  |
| 4           | 21.5            | 109.5            | July 26 <sup>th</sup> , 2008  |
| 5           | 24.7            | 113.3            | July 30 <sup>th</sup> , 2008  |
| 6           | 27.5            | 117.5            | August 2 <sup>nd</sup> , 2008 |
